# Supplementary material for: A Replication Study Identified Seven SNPs Associated with Quantitative Traits of Type 2 Diabetes among Chinese Population in A Cross-Sectional Study
Source: PubMed Central journal article supplement (PMC7177704; doi:10.3390/ijerph17072439), 2020-04-03
Supplement: ijerph-17-02439-s001.pdf [file ijerph-17-02439-s001.pdf]

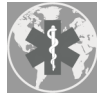

## Supplemental Tables

**Table S1.** Hardy-Weinberg equilibrium test of T2D-associated loci.

| Identified Association to | Loci              | Chr      | Reported Gene  | Allele     | Genotype        | Genotype Freq    | P Value          |
|---------------------------|-------------------|----------|----------------|------------|-----------------|------------------|------------------|
| T2D                       | rs340874          | 1        | PROX1          | T/C        | TT/CT/CC        | 524/712/247      | 0.872            |
|                           | rs243021          | 2        | BCL11A         | A/G        | AA/GA/GG        | 708/642/156      | 0.552            |
|                           | rs2943641         | 2        | IRS1           | C/T        | CC/CT/TT        | 1304/210/11      | 0.463            |
|                           | rs3923113         | 2        | GRB14          | A/C        | AA/CA/CC        | 1129/352/27      | 1.000            |
|                           | rs7593730         | 2        | RBMS1, ITGB6   | C/T        | CC/CT/TT        | 1058/430/35      | 0.304            |
|                           | rs780094          | 2        | GCKR           | T/C        | TT/TC/CC        | 365/742/355      | 0.601            |
|                           | rs1470579         | 3        | IGF2BP2        | A/C        | AA/CA/CC        | 860/566/91       | 0.945            |
|                           | rs16861329        | 3        | ST6GAL1        | C/T        | CC/TC/TT        | 896/530/78       | 1.000            |
|                           | rs4607103         | 3        | ADAMTS9        | C/T        | CC/CT/TT        | 606/679/227      | 0.111            |
|                           | rs4858889         | 3        | SCAP           | A/G        | AA/GA/GG        | 1091/363/28      | 0.830            |
|                           | rs7612463         | 3        | UBE2E2         | C/A        | CC/CA/AA        | 981/462/66       | 0.222            |
|                           | rs831571          | 3        | PSMD6          | C/T        | CC/CT/TT        | 605/716/196      | 0.507            |
|                           | rs6815464         | 4        | MAEA           | C/G        | CC/CG/GG        | 508/760/236      | 0.088            |
|                           | rs459193          | 5        | ANKRD55        | G/A        | GG/GA/AA        | 400/757/349      | 0.837            |
|                           | rs10946398        | 6        | CDKAL1         | A/C        | AA/CA/CC        | 503/785/219      | 0.002            |
|                           | rs1535500         | 6        | KCNK16         | G/T        | GG/GT/TT        | 424/755/329      | 0.877            |
|                           | rs9470794         | 6        | ZFAND3         | T/C        | TT/CT/CC        | 707/648/160      | 0.516            |
|                           | rs2191349         | 7        | DGKB, TMEM195  | T/G        | TT/GT/GG        | 632/631/211      | 0.009            |
|                           | rs4607517         | 7        | GCK            | G/A        | GG/GA/AA        | 918/501/76       | 0.495            |
|                           | rs864745          | 7        | JAZF1          | T/C        | TT/CT/CC        | 863/572/64       | 0.011            |
|                           | rs972283          | 7        | KLF14          | G/A        | GG/GA/AA        | 794/605/107      | 0.603            |
|                           | rs13266634        | 8        | SLC30A8        | C/T        | CC/TC/TT        | 443/798/268      | 0.006            |
|                           | rs516946          | 8        | ANK1           | C/T        | CC/TC/TT        | 1165/345/13      | 0.022            |
|                           | rs896854          | 8        | TP53INP1       | C/T        | CC/CT/TT        | 699/649/163      | 0.517            |
|                           | rs10811661        | 9        | CDKN2A, CDKN2B | T/C        | TT/TC/CC        | 396/774/268      | 0.001            |
|                           | <b>rs13292136</b> | <b>9</b> | <b>CHCHD9</b>  | <b>C/T</b> | <b>CC/TC/TT</b> | <b>1522/4/15</b> | <b>&lt;0.001</b> |
|                           | rs17584499        | 9        | PTPRD          | C/T        | CC/CT/TT        | 1226/282/14      | 0.779            |
|                           | rs2796441         | 9        | TLE1           | A/G        | AA/AG/GG        | 536/702/240      | 0.704            |
|                           | rs7041847         | 9        | GLIS3          | A/G        | GG/AG/AA        | 406/780/312      | 0.087            |
|                           | rs10886471        | 10       | GRK5           | C/T        | CC/TC/TT        | 867/508/66       | 0.492            |

|                     |                   |           |                |            |                 |                    |                  |
|---------------------|-------------------|-----------|----------------|------------|-----------------|--------------------|------------------|
|                     | rs10906115        | 10        | CDC123, CAMK1D | A/G        | AA/AG/GG        | 594/741/182        | 0.035            |
|                     | rs11257655        | 10        | CDC123         | T/C        | TT/CT/CC        | 479/752/256        | 0.203            |
|                     | <b>rs12571751</b> | <b>10</b> | <b>ZMIZ1</b>   | <b>A/G</b> | <b>AA/GA/GG</b> | <b>1229/56/227</b> | <b>&lt;0.001</b> |
|                     | <b>rs1802295</b>  | <b>10</b> | <b>VPS26A</b>  | <b>C/T</b> | <b>CC/TC/TT</b> | <b>932/384/237</b> | <b>&lt;0.001</b> |
|                     | rs5015480         | 10        | HHEX           | C/T        | TT/CT/CC        | 997/453/41         | 0.253            |
|                     | rs10830963        | 11        | MTNR1B         | C/G        | CC/CG/GG        | 486/775/245        | 0.030            |
|                     | rs1552224         | 11        | CENTD2         | A/C        | AA/CA/CC        | 1283/238/9         | 0.738            |
|                     | rs2237892         | <b>11</b> | <b>KCNQ1</b>   | C/T        | CC/TC/TT        | 652/737/142        | 0.001            |
|                     | <b>rs231362</b>   | <b>11</b> | <b>KCNQ1</b>   | <b>G/A</b> | <b>GG/GA/AA</b> | <b>1453/17/25</b>  | <b>&lt;0.001</b> |
|                     | rs5215            | 11        | KCNJ11         | C/T        | TT/CT/CC        | 540/756/222        | 0.108            |
|                     | rs10842994        | 12        | KLHDC5         | C/T        | CC/CT/TT        | 999/488/44         | 0.094            |
|                     | <b>rs1531343</b>  | <b>12</b> | <b>HMGA2</b>   | <b>G/C</b> | <b>GG/GC/CC</b> | <b>1503/14/10</b>  | <b>&lt;0.001</b> |
|                     | rs7961581         | 12        | TSPAN8, LGR5   | T/C        | TT/CT/CC        | 924/527/66         | 0.450            |
|                     | <b>rs1359790</b>  | <b>13</b> | <b>SPRY2</b>   | <b>G/A</b> | <b>GG/GA/AA</b> | <b>1310/167/34</b> | <b>&lt;0.001</b> |
|                     | rs11634397        | 15        | ZFAND6         | A/G        | AA/AG/GG        | 1239/251/20        | 0.077            |
|                     | rs2028299         | 15        | AP3S2          | A/C        | AA/CA/CC        | 964/505/69         | 0.758            |
|                     | rs7172432         | 15        | C2CD4A, C2CD4B | A/G        | AA/GA/GG        | 578/736/200        | 0.170            |
|                     | rs7178572         | 15        | HMG20A         | A/G        | AA/AG/GG        | 583/738/191        | 0.078            |
|                     | rs7403531         | 15        | RASGRP1        | C/T        | CC/TC/TT        | 598/618/167        | 0.721            |
|                     | rs1558902         | 16        | FTO            | T/A        | TT/AT/AA        | 1154/307/26        | 0.273            |
|                     | rs7202877         | 16        | BCAR1          | T/G        | TT/GT/GG        | 993/481/52         | 0.563            |
|                     | rs8050136         | 16        | FTO            | C/A        | CC/CA/AA        | 1189/312/23        | 0.621            |
|                     | rs4430796         | 17        | HNF1B          | A/G        | AA/AG/GG        | 748/615/119        | 0.658            |
|                     | rs12454712        | 18        | BCL2           | T/C        | TT/CT/CC        | 479/754/286        | 0.754            |
|                     | rs12970134        | 18        | MC4R           | G/A        | GG/GA/AA        | 1013/407/44        | 0.710            |
|                     | rs8090011         | 18        | LAMA1          | G/C        | GG/CG/CC        | 751/547/114        | 0.316            |
|                     | rs10401969        | 19        | CILP2          | T/C        | TT/CT/CC        | 1298/226/14        | 0.237            |
|                     | <b>rs3786897</b>  | <b>19</b> | <b>PEPD</b>    | <b>A/G</b> | <b>AA/GA/GG</b> | <b>378/822/279</b> | <b>&lt;0.001</b> |
|                     | rs3794991         | 19        | GATAD2A        | C/T        | CC/TC/TT        | 1301/169/8         | 0.369            |
|                     | <b>rs4812829</b>  | <b>20</b> | <b>HNF4A</b>   | <b>G/A</b> | <b>GG/GA/AA</b> | <b>487/582/446</b> | <b>&lt;0.001</b> |
|                     | <b>rs6017317</b>  | <b>20</b> | <b>HNF4A</b>   | <b>T/G</b> | <b>TT/GT/GG</b> | <b>410/710/168</b> | <b>&lt;0.001</b> |
| <b>Birth weight</b> | rs724577          | 4         | LCORL          | C/A        | CC/CA/AA        | 385/757/267        | 0.002            |
|                     | rs4432842         | 5         | 5q11.2         | T/C        | TT/CT/CC        | 425/779/310        | 0.179            |
|                     | rs6931514         | 6         | CDKAL1         | G/A        | GG/AG/AA        | 332/745/293        | 0.001            |
|                     | <b>rs1801253</b>  | <b>10</b> | <b>ADRB1</b>   | <b>C/G</b> | <b>CC/CG/GG</b> | <b>494/788/201</b> | <b>&lt;0.001</b> |
|                     | rs1042725         | 12        | HMGA2          | T/C        | TT/CT/CC        | 971/493/63         | 0.937            |

|            |                 |           |                |            |                 |                    |                  |
|------------|-----------------|-----------|----------------|------------|-----------------|--------------------|------------------|
| <b>BMI</b> | rs2568958       | 1         | 1p31           | A/G        | AA/AG/GG        | 1254/228/13        | 0.409            |
|            | rs574367        | 1         | SEC16B         | G/T        | GG/GT/TT        | 931/476/50         | 0.283            |
|            | rs7561317       | 2         | TMEM18         | G/A        | GG/GA/AA        | 1188/266/9         | 0.180            |
|            | rs16892496      | 8         | TRHR           | A/C        | AA/CA/CC        | 388/760/338        | 0.377            |
|            | rs7832552       | 8         | TRHR           | C/T        | CC/TC/TT        | 396/746/361        | 0.796            |
|            | rs11030104      | 11        | BDNF, BDNF-AS  | A/G        | AA/GA/GG        | 395/737/319        | 0.494            |
|            | rs6265          | 11        | BDNF, BDNF-AS  | C/T        | CC/CT/TT        | 389/768/306        | 0.046            |
|            | <b>rs925946</b> | <b>11</b> | <b>BDNF-AS</b> | <b>G/T</b> | <b>GG/GT/TT</b> | <b>1367/114/10</b> | <b>&lt;0.001</b> |
|            | rs9939609       | 16        | FTO            | T/A        | TT/AT/AA        | 1163/302/22        | 0.614            |

*P* values < 0.001 are shown in bold for deviation from Hardy-weinberg equilibrium.

**Table S2.** Overview of investigated genetic variants associated with insulin resistance.

| Loci       | Chr | Reported Gene | RA | Other Allele | $\beta$ | Identified by Association to | Reference               |
|------------|-----|---------------|----|--------------|---------|------------------------------|-------------------------|
| rs780094   | 2   | GCKR          | C  | T            | 0.0583  | type 2 diabetes              | Ingelsson E et al. [1]  |
| rs7593730  | 2   | RBMS1, ITGB6  | C  | T            | 0.1044  | type 2 diabetes              | Qi L et al. [2]         |
| rs3923113  | 2   | GRB14         | A  | C            | 0.0677  | type 2 diabetes              | Kooner JS et al. [3]    |
| rs2943641  | 2   | IRS1          | C  | T            | 0.174   | type 2 diabetes              | Ohshige T et al. [4]    |
| rs831571   | 3   | PSMD6         | T  | C            | -0.0896 | type 2 diabetes              | Chen M et al. [5]       |
| rs4607103  | 3   | ADAMTS9       | C  | T            | 0.0862  | type 2 diabetes              | Zeggini E et al. [6]    |
| rs16861329 | 3   | ST6GAL1       | T  | C            | -0.1508 | type 2 diabetes              | Qi L et al. [2]         |
| rs459193   | 5   | ANKRD55       | G  | A            | 0.077   | type 2 diabetes              | Harder MN et al. [7]    |
| rs972283   | 7   | KLF14         | G  | A            | 0.0392  | type 2 diabetes              | Voight BF et al. [8]    |
| rs17584499 | 9   | PTPRD         | T  | C            | 0.4511  | type 2 diabetes              | Chang YC et al. [9]     |
| rs10886471 | 10  | GRK5          | C  | T            | 0.1133  | type 2 diabetes              | Huaxing Li et al. [10]  |
| rs2028299  | 15  | AP3S2         | C  | A            | 0.0392  | type 2 diabetes              | Kazakova EV et al. [11] |
| rs12970134 | 18  | MC4R          | A  | G            | 0.077   | type 2 diabetes              | Bradnová O et al. [12]  |
| rs12454712 | 18  | BCL2          | T  | C            | 0.04    | type 2 diabetes              | Walford GA et al. [13]  |
| rs1558902  | 16  | FTO           | A  | T            | 0.0993  | type 2 diabetes              | Zheng Y et al. [14]     |
| rs9939609  | 16  | FTO           | A  | T            | 0.33    | BMI                          | Zheng Y et al. [14]     |
| rs896854   | 8   | TP53INP1      | T  | C            | 0.0488  | type 2 diabetes              | Jia Liu et al. [15]     |
| rs7561317  | 2   | TMEM18        | G  | A            | 1.8116  | BMI                          | Sandholt CH et al. [16] |
| rs6265     | 11  | BDNF, BDNF-AS | T  | C            | 0.0343  | BMI                          | Daily JW et al. [17]    |
| rs7832552  | 8   | TRHR          | T  | C            | 0.102   | Low lean body mass           | Lunardi CC et al. [18]  |
| rs16892496 | 8   | TRHR          | C  | A            | 0.8065  | Low lean body mass           | Lunardi CC et al. [18]  |
| rs724577   | 4   | LCORL         | C  | A            | -0.042  | birth weight                 | Horikoshi M et al. [19] |

**Table S3.** Overview of investigated genetic variants associated with insulin release.

| Loci       | Chr | Reported Gene  | RA | Other Allele | $\beta$ | Identified by Association to | Reference                      |
|------------|-----|----------------|----|--------------|---------|------------------------------|--------------------------------|
| rs340874   | 1   | PROX1          | C  | T            | 0.0677  | type 2 diabetes              | Philips R et al. [20]          |
| rs4607517  | 7   | GCK            | A  | G            | 0.077   | type 2 diabetes              | Ingelsson E et al. [1]         |
| rs2191349  | 7   | DGKB, TMEM195  | T  | G            | 0.0488  | type 2 diabetes              | Hong K et al. [21]             |
| rs516946   | 8   | ANK1           | C  | T            | 0.0862  | type 2 diabetes              | Harder MN et al. [7]           |
| rs5015480  | 10  | HHEX           | C  | T            | 0.1398  | type 2 diabetes              | Philips R et al. [20]          |
| rs10830963 | 11  | MTNR1B         | G  | C            | 0.0953  | type 2 diabetes              | Wang Y et al. [22]             |
| rs7403531  | 15  | RASGRP1        | T  | C            | 0.0953  | type 2 diabetes              | Huaixing Li et al. [10]        |
| rs7202877  | 16  | BCAR1          | T  | G            | 0.1133  | type 2 diabetes              | Harder MN et al. [7]           |
| rs4430796  | 17  | HNF1B          | G  | A            | 0.1222  | type 2 diabetes              | Machado-Silva W et al. [23]    |
| rs7612463  | 3   | UBE2E2         | C  | A            | 0.0953  | type 2 diabetes              | Xu K et al. [24]               |
| rs1535500  | 6   | KCNK16         | T  | G            | 0.0952  | type 2 diabetes              | Nicholas C et al. [25]         |
| rs7041847  | 9   | GLIS3          | A  | G            | 0.0872  | type 2 diabetes              | Muller YL et al. [26]          |
| rs5215     | 11  | KCNJ11         | C  | T            | 0.0677  | type 2 diabetes              | Gjesing AP et al. [27]         |
| rs864745   | 7   | JAZF1          | T  | C            | 0.0953  | type 2 diabetes              | Grarup N et al. [28]           |
| rs7961581  | 12  | TSPAN8, LGR5   | C  | T            | 0.0862  | type 2 diabetes              | Grarup N et al. [28]           |
| rs7172432  | 15  | C2CD4A, C2CD4B | A  | G            | 0.1013  | type 2 diabetes              | Grarup N et al. [29]           |
| rs1552224  | 11  | CENTD2         | A  | C            | 0.1044  | type 2 diabetes              | Nielsen T et al. [30]          |
| rs13266634 | 8   | SLC30A8        | T  | C            | -0.0997 | type 2 diabetes              | Steinthorsdottir V et al. [31] |
| rs10946398 | 6   | CDKAL1         | A  | C            | -0.1628 | type 2 diabetes              | Gjesing AP et al. [27]         |
| rs8090011  | 18  | LAMA1          | G  | C            | 0.0296  | type 2 diabetes              | Matsuba R et al. [32]          |
| rs1470579  | 3   | IGF2BP2        | C  | A            | 0.1133  | type 2 diabetes              | Rodriguez S et al. [33]        |
| rs243021   | 2   | BCL11A         | A  | G            | 0.0862  | type 2 diabetes              | Anna Jonsson et al. [34]       |
| rs2568958  | 1   | 1p31           | A  | G            | 1.3271  | BMI                          | Xi B et al. [35]               |
| rs6931514  | 6   | CDKAL1         | G  | A            | -0.051  | birth weight                 | Feng Lu et al. [36]            |
| rs10811661 | 9   | CDKN2A,CDKN2B  | T  | C            | 0.1655  | type 2 diabetes              | Zeggini E et al. [37]          |
| rs8050136  | 16  | FTO            | A  | C            | 0.1356  | type 2 diabetes              | MR Wing et al. [38]            |
| rs11634397 | 15  | ZFAND6         | G  | A            | 0.0488  | type 2 diabetes              | Zhao Q et al. [39]             |

## References

1. Ingelsson, E.; Langenberg, C.; Hivert, M.F.; Prokopenko, I.; Lyssenko, V.; Dupuis, J.; Mägi, R.; Sharp, S.; Jackson, A.U.; Assimes, T.L.; et al. Detailed Physiologic Characterization Reveals Diverse Mechanisms for Novel Genetic Loci Regulating Glucose and Insulin Metabolism in Humans. *Diabetes* **2010**, *59*, 1266–1275.
2. Qi, L.; Cornelis, M.C.; Kraft, P.; Stanya, K.J.; Linda Kao, W.H.; Pankow, J.S.; Dupuis, J.; Florez, J.C.; Fox, C.S.; Paré, G.; et al. Genetic variants at 2q24 are associated with susceptibility to type 2 diabetes. *Hum. Mol. Genet.* **2010**, *19*, 2706–2715.
3. Kooner, J.S.; Saleheen, D.; Sim, X.; Sehmi, J.; Zhang, W.; Frossard, P.; Been, L.F.; Chia, K.S.; Dimas, A.S.; Hassanali, N.; et al. Genome-wide association study in individuals of South Asian ancestry identifies six new type 2 diabetes susceptibility loci. *Nat. Genet.* **2011**, *43*, 984–989.
4. Ohshige, T.; Iwata, M.; Omori, S.; Tanaka, Y.; Hirose, H.; Kaku, K.; Maegawa, H.; Watada, H.; Kashiwagi, A.; Kawamori, R.; et al. Association of new loci identified in European genome-wide association studies with susceptibility to type 2 diabetes in the Japanese. *PLoS ONE* **2011**, *6*, e26911.
5. Chen, M.; Hu, C.; Zhang, R.; Jiang, F.; Wang, J.; Peng, D.F.; Tang, S.S.; Sun X.; Yan J.; Wang S.Y.; et al. A variant of PSMD6 is associated with the therapeutic efficacy of oral antidiabetic drugs in Chinese type 2 diabetes patients. *Sci. Rep.* **2015**, *5*, 10701.
6. Zeggini, E.; Scott, L.J.; Saxena, R.; Voight, B.F.; Marchini, J.L.; Hu, T.; de Bakker, P.I.; Abecasis, G.R.; Almgren, P.; Andersen, G.; et al. Meta-analysis of genome-wide association data and large-scale replication identifies additional susceptibility loci for type 2 diabetes. *Nat. Genet.* **2008**, *40*, 638–645.
7. Harder, M.N.; Ribel-Madsen, R.; Justesen, J.M.; Sparsø, T.; Andersson, E.A.; Grarup, N.; Jørgensen, T.; Linneberg, A.; Hansen, T.; Pedersen, O. Type 2 Diabetes Risk Alleles NearBCAR1 and inANK1Associate With Decreased  $\beta$ -Cell Function Whereas Risk Alleles NearANKRD55 and GRB14Associate With Decreased Insulin Sensitivity in the Danish Inter99 Cohort. *J. Clin. Endocrinol. Metab.* **2013**, *98*, E801–E806.
8. Voight, B.F.; Scott, L.J.; Steinthorsdottir, V.; Morris, A.P.; Dina, C.; Welch, R.P.; Zeggini, E.; Huth, C.; Aulchenko, Y.S.; Thorleifsson, G.; et al. Twelve type 2 diabetes susceptibility loci identified through large-scale association analysis. *Nat. Genet.* **2010**, *42*, 579.
9. Chang, Y.C.; Chiu, Y.F.; Liu, P.H.; Shih, K.C.; Lin, M.W.; Sheu, W.H.; Quertermous, T.; Curb, J.D.; Hsiung, C.A.; Lee, W.J.; et al. Replication of genome-wide association signals of type 2 diabetes in Han Chinese in a prospective cohort. *Clin. Endocrinol.* **2012**, *76*, 365–372.
10. Li, H.X.; Gan, W.; Lu, L.; Dong, X.; Han, X.Y.; Hu, C.; Yang, Z.; Sun, L.; Bao, W.; Li, P.T.; et al. A Genome-Wide Association Study Identifies GRK5 and RASGRP1 as Type 2 Diabetes Loci in Chinese Hans. *Diabetes* **2013**, *62*, 291–298.
11. Kazakova, E.V.; Zghuang, T.W.; Li, T.T.; Fang, Q.X.; Han, J.; Qiao, H. The Gas6 gene rs8191974 and Ap3s2 gene rs2028299 are associated with type 2 diabetes in the northern Chinese Han population. *Acta Biochim. Pol.* **2017**, *64*, 227–231.
12. Bradnová, O.; Vejražková, D.; Vaňková, M.; Lukášová, P.; Včelák, J.; Stanická, S.; Dvořáková, K.; Bendlová, B. Metabolic and Hormonal Consequencies of the “Obesity Risk” MC4R Variant (rs12970134) in Czech Women. *Physiol. Res.* **2015**, *64*, S187–S195.
13. Walford, G.A.; Gustafsson, S.; Rybin, D.; Stančáková, A.; Chen, H.; Liu, C.T.; Hong, J.; Jensen, R.A.; Rice, K.; Morris, A.P.; et al. Genome-Wide Association Study of the Modified Stumvoll Insulin Sensitivity Index Identifies BCL2 and FAM19A2 as Novel Insulin Sensitivity Loci. *Diabetes* **2016**, *65*, 3200–3211.
14. Zheng, Y.; Huang, T.; Zhang, X.M.; Rood, J.; Bray, G.A.; Sacks, F.M.; Qi, L. Dietary Fat Modifies the Effects of FTO Genotype on Changes in Insulin Sensitivity. *J. Nutr.* **2015**, *145*, 977–982.
15. Liu, J.; Wang, L.; Qian, Y.; Dai, J.C.; Shen, C.; Jin, G.F.; Hu, Z.B.; Shen, H.B. Association of 48 type2 diabetes susceptibility loci with fasting plasma glucose. *Diabetes Res. Clin. Pract.* **2018**, *139*, 114–121.
16. Sandholt, C.H.; Vestmar, M.A.; Bille, D.S.; Borglykke, A.; Almind, K.; Hansen, L.; Sandbæk, A.; Lauritzen, T.; Witte, D.; Jørgensen, T.; et al. Studies of metabolic phenotypic correlates of 15 obesity associated gene variants. *PLoS ONE* **2011**, *6*, e23531.
17. Daily, J.W.; Park, S. Interaction of BDNF rs6265 variants and energy and protein intake in the risk for glucose intolerance and type 2 diabetes in middle-aged adults. *Nutrition* **2017**, *33*, 187–194.
18. Lunardi, C.C.; Lima, R.M.; Pereira, R.W.; Leite, T.K.; Siqueira, A.B.; Oliveira, R.J. Association between polymorphisms in the TRHR gene, fat-free mass, and muscle strength in older women. *Age* **2013**, *35*, 2477–2483.

19. Horikoshi, M.; Yaghoobka, H.; Mook-Kanamori, D.O.; Sovio, U.; Taal, H.R.; Hennig, B.J.; Bradfield, J.P.; St Pourcain, B.; Evans, D.M.; Charoen, P.; et al. New loci associated with birth weight identify genetic links between intrauterine growth and adult height and metabolism. *Nat. Genet.* **2013**, *45*, 76–82.
20. Philips, R.; Langston, L.; Hwang, H.; Vandergriff, T.; Trynosky, T.; Berlinger-Ramos, A.C. Primary cutaneous histiocytoid carcinoma with distant metastasis. *J. Cutan. Pathol.* **2017**, *44*, 376–380.
21. Hong, K.; Chung, M.; Cho, S.B. Meta-analysis of genome-wide association study of homeostasis model assessment  $\beta$  cell function and insulin resistance in an East Asian population and the European results. *Mol. Genet. Genomics* **2014**, *289*, 1247–1255.
22. Wang, Y.; Nie, M.; Li, W.; Ping, F.; Hu, Y.; Ma, L.; Gao, J.; Liu, J. Association of six single nucleotide polymorphisms with gestational diabetes mellitus in a Chinese population. *PLoS ONE* **2011**, *6*, e26953.
23. Machado-Silva, W.; Tonet-Furioso, A.C.; Gomes, L.; Córdova, C.; Moraes, C.F.; Nóbrega, O.T. The rs4430796 SNP of the HNF1 $\beta$  gene associates with type 2 diabetes in older adults. *Rev. Assoc. Med. Bras.* **2018**, *64*, 586–589.
24. Xu, K.; Jiang, L.; Zhang, M.; Zheng, X.; Gu, Y.; Wang, Z.; Cai, Y.; Dai, H.; Shi, Y.; Zheng, S.; et al. Type 2 Diabetes Risk Allele UBE2E2 Is Associated With Decreased Glucose-Stimulated Insulin Release in Elderly Chinese Han Individuals. *Medicine* **2016**, *95*, e3604.
25. Vierra, N.C.; Dadi, P.K.; Jeong, I.; Dickerson, M.; Powell, D.R.; Jacobson, D.A. Type 2 Diabetes—Associated K<sup>+</sup> Channel TALK-1 Modulates  $\beta$ -Cell Electrical Excitability, Second-Phase Insulin Secretion, and Glucose Homeostasis. *Diabetes* **2015**, *64*, 3818–3828.
26. Muller, Y.L.; Piaggi, P.; Chen, P.; Wiessner, G.; Okani, C.; Kobes, S.; Knowler, W.C.; Bogardus, C.; Hanson, R.L.; Baier, L.J. Assessing variation across 8 established East Asian loci for type 2 diabetes mellitus in American Indians: Suggestive evidence for new sex-specific diabetes signals in GLIS3 and ZFAND3. *Diabetes Metab. Res. Rev.* **2017**, *33*, e2869.
27. Gjesing, A.P.; Hornbak, M.; Allin, K.H.; Ekstrøm, C.T.; Urhammer, S.A.; Eiberg, H.; Pedersen, O.; Hansen, T. High heritability and genetic correlation of intravenous glucose- and tolbutamide-induced insulin secretion among non-diabetic family members of type 2 diabetic patients. *Diabetologia* **2014**, *57*, 1173–1181.
28. Grarup, N.; Andersen, G.; Krarup, N.T.; Albrechtsen, A.; Schmitz, O.; Jørgensen, T.; Borch-Johnsen, K.; Hansen, T.; Pedersen, O. Association Testing of Novel Type 2 Diabetes Risk Alleles in the JAZF1, CDC123/CAMK1D, TSPAN8, THADA, ADAMTS9, and NOTCH2 Loci With Insulin Release, Insulin Sensitivity, and Obesity in a Population-Based Sample of 4,516 Glucose-Tolerant Middle-Aged Danes. *Diabetes* **2008**, *57*, 2534–2540.
29. Grarup, N.; Overvad, M.; Sparsø, T.; Witte, D.R.; Pisinger, C.; Jørgensen, T.; Yamauchi, T.; Hara, K.; Maeda, S.; Kadowaki, T.; et al. The diabetogenic VPS13C/C2CD4A/C2CD4B rs7172432 variant impairs glucose-stimulated insulin response in 5,722 non-diabetic Danish individuals. *Diabetologia* **2011**, *54*, 789–794.
30. Nielsen, T.; Sparsø, T.; Grarup, N.; Jørgensen, T.; Pisinger, C.; Witte, D.R.; Diabetes Genetics Replication and Meta-analysis (DIAGRAM) Consortium; Hansen, T.; Pedersen, O. Type 2 diabetes risk allele near CENTD2 is associated with decreased glucose-stimulated insulin release. *Diabetologia* **2011**, *54*, 1052–1056.
31. Steinthorsdottir, V.; Thorleifsson, G.; Reynisdottir, I.; Benediktsson, R.; Jonsdottir, T.; Walters, G.B.; Styrkarsdottir, U.; Gretarsdottir, S.; Emilsson, V.; Ghosh, S.; et al. A variant in CDKAL1 influences insulin response and risk of type 2 diabetes. *Nat. Genet.* **2007**, *39*, 770–775.
32. Matsuba, R.; Sakai, K.; Imamura, M.; Tanaka, Y.; Iwata, M.; Hirose, H.; Kaku, K.; Maegawa, H.; Watada, H.; Tobe, K.; et al. Replication Study in a Japanese Population to Evaluate the Association between 10 SNP Loci, Identified in European Genome-Wide Association Studies, and Type 2 Diabetes. *PLoS ONE* **2015**, *10*, e126363.
33. Rodriguez, S.; Eiriksdottir, G.; Gaun, T.R.; Harris, T.B.; Launer, L.J.; Gudnason, V.; Day, I.N. IGF2BP1, IGF2BP2 and IGF2BP3 genotype, haplotype and genetic model studies in metabolic syndrome traits and diabetes. *Growth Horm. IGF Res.* **2010**, *20*, 310–318.
34. Jonsson, A.; Ladenvall, C.; Ahluwalia, T.S.; Kravic, J.; Krus, U.; Taneera, J.; Isomaa, B.; Tuomi, T.; Renström, E.; Groop, L.; et al. Effects of Common Genetic Variants Associated With Type 2 Diabetes and Glycemic Traits on  $\alpha$ - and  $\beta$ -Cell Function and Insulin Action in Humans. *Diabetes* **2013**, *62*, 2978–2983.
35. Xi, B.; Takeuchi, F.; Meirhaeghe, A.; Kato, N.; Chambers, J.C.; Morris, A.P.; Cho, Y.S.; Zhang, W.; Mohlke, K.L.; Kooner, J.S.; et al. Associations of genetic variants in/near body mass index-associated genes with type 2 diabetes: A systematic meta-analysis. *Clin. Endocrinol.* **2014**, *81*, 702–710.

36. Lu, F.; Qian, Y.; Li, H.; Dong, M.; Lin, Y.; Du, J.; Lin, Y.; Chen, J.; Shen, C.; Jin, G.; et al. Genetic variants on chromosome 6p21.1 and 6p22.3 are associated with type 2 diabetes risk: A case—Control study in Han Chinese. *J. Hum. Genet.* **2012**, *57*, 320–325.
37. Zeggini, E.; Weedon, M.N.; Lindgren, C.M.; Frayling, T.M.; Elliott, K.S.; Lango, H.; Timpson, N.J.; Perry, J.R.; Rayner, N.W.; Freathy, R.M.; et al. Replication of Genome-Wide Association Signals in UK Samples Reveals Risk Loci for Type 2 Diabetes. *Science* **2007**, *316*, 1336–1341.
38. Wing, M.R.; Ziegler, J.M.; Langefeld, C.D.; Roh, B.H.; Palmer, N.D.; Mayer-Davis, E.J.; Rewers, M.J.; Haffner, S.M.; Wagenknecht, L.E.; Bowden, D.W. Analysis of FTO gene variants with obesity and glucose homeostasis measures in the multiethnic Insulin Resistance Atherosclerosis Study cohort. *Int. J. Obes.* **2011**, *35*, 1173–1182.
39. Zhao, Q.; Xiao, J.; He, J.; Zhang, X.; Hong, J.; Kong, X.; Mills, K.T.; Weng, J.; Jia, W.; Yang, W. Cross-sectional and longitudinal replication analyses of genome-wide association loci of type 2 diabetes in Han Chinese. *PLoS ONE* **2014**, *9*, e91790.

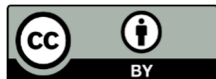

© 2020 by the authors. Submitted for possible open access publication under the terms and conditions of the Creative Commons Attribution (CC BY) license (<http://creativecommons.org/licenses/by/4.0/>).
